# Supplementary material
Source: PubMed Central journal article supplement (PMC5796652)
Supplement: NIHMS935027-supplement-Online_supplement.pdf [file NIHMS935027-supplement-Online_supplement.pdf]

## SUPPLEMENTAL MATERIALS

### Long-Term Risk of Dementia among Survivors of Ischemic or Hemorrhagic Stroke

Corraini P, Henderson VW, Ording AG, Pedersen L, Horváth-Puhó E, Sørensen HT

#### Contents

- Supplemental Methods.** Variables used to ascertain or infer smoking and substance abuse in the study population, and covariates included in the adjusted analyses.
- Supplemental Table I.** ICD and procedure codes used in the study.
- Supplemental Table II.** Characteristics of the stroke and comparison cohorts at study entry.
- Supplemental Table III.** Hazard ratios (HRs) for dementia in patients with first-time stroke of any type or ischemic stroke, in the context of previous cohort studies not restricted to patients age 65 years or older.
- Supplemental Table IV.** Hazard ratios for dementia by age at index date, according to type of incident stroke.
- Supplemental Table V.** Dementia rates and hazard ratios among stroke survivors, according to sex and type of incident stroke.
- Supplemental Table VI.** Rates of Alzheimer's disease, vascular dementia, and other dementia, and hazard ratios (HRs) for specific dementias, according to stroke type.
- Supplemental Table VII.** Hazard ratios for dementia according to type of stroke, restricting the study population to stroke patients who underwent MRI or CT during hospitalization for stroke, as from the year 2000.
- Supplemental Table VIII.** Hazard ratios for dementia within the first year after stroke diagnosis among ischemic stroke, intracerebral hemorrhage, and subarachnoid hemorrhage patients, with the index date set as 6 months post-stroke.
- Supplemental Table IX.** Dementia incidence rates and unadjusted hazard ratios (HRs), according to stroke type in the index periods of 1982-1994, 1995-2003 and 2004-2013.

## Supplemental Methods.

### *Variables used to ascertain or infer smoking and substance abuse in the study population*

We ascertained or inferred smoking from smoking cessation intervention codes, administrative coding of current or former smoking, and ICD diagnoses of smoking-related conditions or chronic pulmonary disease.<sup>1</sup> Substance abuse was identified from diagnoses of alcoholic cirrhosis, alcohol-induced psychosis, alcohol abuse syndrome, and drug abuse.

### *Covariates included in the adjusted analyses*

We created three adjusted models to separate traditional vascular factors for ischemic stroke<sup>2</sup> from other stroke risk factors, as well as to avoid collinearity among vascular conditions. The first model then included vascular risk factors most commonly associated with stroke; *viz.*, the presence or absence of diabetes, atrial fibrillation, hypertension, and smoking. In the second model, we added the presence (yes/no) of hyperlipidemia alone, due to its suggestive protective effect for ICH,<sup>3</sup> and the presence (any/none) of at least one other vascular condition, *viz.* myocardial infarction, heart failure, or peripheral vascular disease. In the third model, we added the presence (yes/no) of traumatic brain injury, depression, and substance abuse.

## **References**

1. Sogaard M, Heide-Jorgensen U, Norgaard M, Johnsen SP, Thomsen RW. Evidence for the low recording of weight status and lifestyle risk factors in the Danish national registry of patients, 1999-2012. *BMC Public Health*. 2015;15:13
2. Bang OY, Ovbiagele B, Kim JS. Nontraditional risk factors for ischemic stroke: An update. *Stroke*. 2015;46:3571-3578
3. Ariesen MJ, Claus SP, Rinkel GJ, Algra A. Risk factors for intracerebral hemorrhage in the general population: A systematic review. *Stroke*. 2003;34:2060-2065

**Supplemental Table I.** ICD and procedure codes used in the study.

| <b>Stroke</b>                                                    | <b>ICD-8</b>                                      | <b>ICD-10</b>                                                                                                 |
|------------------------------------------------------------------|---------------------------------------------------|---------------------------------------------------------------------------------------------------------------|
| Ischemic stroke                                                  | 433-434                                           | I63                                                                                                           |
| ICH                                                              | 431                                               | I61                                                                                                           |
| SAH                                                              | 430                                               | I60                                                                                                           |
| Unspecified stroke                                               | 436                                               | I64                                                                                                           |
| <b>Dementia</b>                                                  |                                                   |                                                                                                               |
| Alzheimer's disease                                              | 290.10, 290.09                                    | F00, G30                                                                                                      |
| Vascular dementia                                                | 293.09, 293.19                                    | F01                                                                                                           |
| Other dementia                                                   | 094.19, 290.11-290.19,<br>292.09                  | F02-F03, F1x.73 series (F10.73-<br>F19.73),<br>G23.1, G31.0, G31.0A, G31.0B, G31.1,<br>G31.8B, G31.8E, G31.85 |
| <b>Underlying vascular conditions</b>                            |                                                   |                                                                                                               |
| Myocardial infarction                                            | 410                                               | I21-I23                                                                                                       |
| Congestive heart failure                                         | 427.09-427.11, 427.19,<br>428.99, 782.49          | I50, I11.0, I13.0, I13.2                                                                                      |
| Peripheral vascular disease                                      | 440-445                                           | I70-I74, I77                                                                                                  |
| Diabetes mellitus                                                | 249-250                                           | E10-E11                                                                                                       |
| Atrial fibrillation or flutter                                   | 427.93-94                                         | I48.9                                                                                                         |
| Hyperlipidemia / hypercholesterolemia                            | 272.00-09, 279.00, 279.01                         | E78.0-E78.2, E78.4, E78.5                                                                                     |
| Hypertension                                                     | 400, 401                                          | I10-I11, I13.0, I13.2                                                                                         |
| <b>Smoking-related diagnoses</b>                                 |                                                   |                                                                                                               |
| Chronic pulmonary disease                                        | 490-493, 515-518                                  | J40-J47, J60-J67, J68.4, J70.1<br>Z720A, Z720E                                                                |
| Diagnosis of problems related to active smoking                  |                                                   | <u>Treatment codes:</u> BQFT01, BQFS01                                                                        |
| Smoking prevention counselling or smoking cessation intervention |                                                   | <u>Administrative procedure codes:</u>                                                                        |
| Current or former smoking status                                 |                                                   | ZZP01A1A, ZZP01A1B2, ZZP0020                                                                                  |
| <b>Depression</b>                                                | 296.09, 296.29, 296.99,<br>298.09, 300.49, 300.19 | F32, F33                                                                                                      |
| <b>Traumatic brain injury</b>                                    | 850.99, 851.29-854.99,<br>800.99-801.09, 803.99   | S06.0, S06.1-S06.9, S02.0-S02.1,<br>S02.7, S02.9                                                              |
| <b>Substance abuse diagnoses and related comorbidities</b>       |                                                   |                                                                                                               |
| <i>Drug-related abuse</i>                                        |                                                   |                                                                                                               |
| Opioids                                                          | 304.09, 304.19                                    | F11.0-F11.9                                                                                                   |
| Cannabis                                                         | 304.59                                            | F12.0-F12.9                                                                                                   |
| Sedatives/hypnotics                                              | 304.29, 304.39                                    | F13.0-F13.9                                                                                                   |
| Cocaine                                                          | 304.49                                            | F14.0-F14.9                                                                                                   |
| Other stimulants                                                 | 304.69                                            | F15.0-F15.9                                                                                                   |
| Hallucinogens                                                    | 304.79                                            | F16.0-F16.9                                                                                                   |
| Other and multiple drugs                                         | 304.89, 304.99                                    | F18.0-F19.9                                                                                                   |
| <i>Alcohol-related abuse</i>                                     |                                                   |                                                                                                               |
| Alcohol psychosis, and alcohol abuse<br>syndrome                 | 291.09-291.99, 303.09-<br>303.99                  | F10.0-F10.9                                                                                                   |
| Alcoholic cirrhosis                                              | 571.09                                            | K70.3                                                                                                         |
| <b>Exclusion criteria</b>                                        |                                                   |                                                                                                               |
| Ischemic stroke                                                  | 433-434                                           | I63                                                                                                           |
| ICH                                                              | 431                                               | I61                                                                                                           |
| SAH                                                              | 430                                               | I60                                                                                                           |
| Unspecified stroke                                               | 436                                               | I64                                                                                                           |
| other cerebrovascular disease                                    | 432, 437, 438                                     | I62, 165-169, G46                                                                                             |
| Hemiplegia                                                       | 344                                               | G81, G82                                                                                                      |

|                                                                 |                                                  |                                                                                                                    |
|-----------------------------------------------------------------|--------------------------------------------------|--------------------------------------------------------------------------------------------------------------------|
| Dementia                                                        | 094.19, 290.09-290.19,<br>292.09, 293.09, 293.19 | F00-F03, G30, F1x.73 series (F10.73-<br>F19.73), G23.1, G31.0, G31.0A,<br>G31.0B, G31.1, G31.8B, G31.8E,<br>G31.85 |
| Mild cognitive impairment                                       | -                                                | F06.7                                                                                                              |
| Amnestic syndromes                                              | 291.19                                           | F04, F04.9, F05.1, F10.6, F18.6, F19.6                                                                             |
| <b>Sensitivity analysis criteria</b>                            |                                                  |                                                                                                                    |
| CT scan of the brain, 1 <sup>st</sup> stroke hospital admission |                                                  | NOMESCO: UXCA                                                                                                      |
| MRI of the brain, 1 <sup>st</sup> stroke hospital admission     |                                                  | NOMESCO: UXMA                                                                                                      |

ICH = Intracerebral hemorrhage, SAH = subarachnoid hemorrhage, CT scan = computed tomography, MRI = magnetic resonance imaging.

**Supplemental Table II.** Characteristics of the stroke and comparison cohorts at study entry.

| Covariate                          | Stroke Cohort                |      |                                 |      |                                          |      |                                        |      |                                     |      | Comparison Cohort<br>(N = 1,075,588) |      |
|------------------------------------|------------------------------|------|---------------------------------|------|------------------------------------------|------|----------------------------------------|------|-------------------------------------|------|--------------------------------------|------|
|                                    | All Strokes<br>(N = 215,118) |      | Ischemic Stroke<br>(N = 84,220) |      | Intracerebral Hemorrhage<br>(N = 16,723) |      | Subarachnoid Hemorrhage<br>(N = 9,872) |      | Unspecified Stroke<br>(N = 104,303) |      |                                      |      |
|                                    | N                            | %    | N                               | %    | N                                        | %    | N                                      | %    | N                                   | %    | N                                    | %    |
| Age (years)                        |                              |      |                                 |      |                                          |      |                                        |      |                                     |      |                                      |      |
| 18-44                              | 11,055                       | 5.1  | 3,878                           | 4.6  | 1,483                                    | 8.9  | 2,744                                  | 27.8 | 2,950                               | 2.8  | 55,365                               | 5.1  |
| 45-64                              | 58,262                       | 27.1 | 25,076                          | 29.8 | 5,509                                    | 32.9 | 4,987                                  | 50.5 | 22,690                              | 21.8 | 291,407                              | 27.1 |
| 65-74                              | 58,421                       | 27.2 | 23,786                          | 28.3 | 4,423                                    | 26.4 | 1,406                                  | 14.3 | 28,806                              | 27.7 | 292,456                              | 27.2 |
| 75-84                              | 63,685                       | 29.6 | 22,952                          | 27.3 | 4,032                                    | 24.1 | 600                                    | 6.1  | 36,101                              | 34.6 | 317,987                              | 29.6 |
| 85+                                | 23,695                       | 11.0 | 8,528                           | 10.1 | 1,276                                    | 7.6  | 135                                    | 1.4  | 13,756                              | 13.2 | 118,373                              | 11.0 |
| Sex, female                        | 102,366                      | 47.6 | 37,946                          | 45.1 | 7,598                                    | 45.4 | 5,872                                  | 59.5 | 50,950                              | 48.8 | 511,828                              | 47.6 |
| Index year                         |                              |      |                                 |      |                                          |      |                                        |      |                                     |      |                                      |      |
| 1982-1994                          | 71,785                       | 33.3 | 19,930                          | 23.7 | 5,227                                    | 31.3 | 3,377                                  | 34.2 | 43,251                              | 41.5 | 358,925                              | 33.4 |
| 1995-2003                          | 72,830                       | 33.9 | 23,675                          | 28.1 | 5,512                                    | 33.0 | 3,055                                  | 30.9 | 40,588                              | 38.9 | 364,150                              | 33.9 |
| 2004-2013                          | 70,503                       | 32.8 | 40,615                          | 48.2 | 5,984                                    | 35.8 | 3,440                                  | 34.8 | 20,464                              | 19.6 | 352,513                              | 32.8 |
| Any vascular condition*            | 108,708                      | 50.5 | 48,687                          | 57.8 | 7,419                                    | 44.4 | 2,245                                  | 22.7 | 50,357                              | 48.3 | 201,273                              | 18.7 |
| Myocardial infarction              | 16,132                       | 7.5  | 6,741                           | 8.0  | 779                                      | 4.7  | 200                                    | 2.0  | 8,412                               | 8.1  | 49,328                               | 4.6  |
| Heart failure                      | 13,818                       | 6.4  | 5,400                           | 6.4  | 661                                      | 4.0  | 120                                    | 1.2  | 7,637                               | 7.3  | 37,898                               | 3.5  |
| Peripheral vascular disease        | 15,172                       | 7.1  | 6,557                           | 7.8  | 705                                      | 4.2  | 635                                    | 6.4  | 7,275                               | 7.0  | 31,705                               | 2.9  |
| Atrial fibrillation or flutter     | 25,091                       | 11.7 | 11,568                          | 13.7 | 1,357                                    | 8.1  | 233                                    | 2.4  | 11,933                              | 11.4 | 44,269                               | 4.1  |
| Diabetes                           | 24,059                       | 11.2 | 10,059                          | 11.9 | 1,282                                    | 7.7  | 288                                    | 2.9  | 12,430                              | 11.9 | 40,186                               | 3.7  |
| Hypertension                       | 59,314                       | 27.6 | 28,182                          | 33.5 | 5,206                                    | 31.1 | 1,262                                  | 12.8 | 24,664                              | 23.6 | 80,007                               | 7.4  |
| Hyperlipidemia                     | 24,190                       | 11.2 | 15,257                          | 18.1 | 1,099                                    | 6.6  | 247                                    | 2.5  | 7,587                               | 7.3  | 20,168                               | 1.9  |
| Smoking <sup>†</sup>               | 16,463                       | 7.7  | 7,084                           | 8.4  | 1,100                                    | 6.6  | 451                                    | 4.6  | 7,828                               | 7.5  | 57,025                               | 5.3  |
| Traumatic brain injury             | 11,042                       | 5.1  | 3,858                           | 4.6  | 1,981                                    | 11.8 | 1,064                                  | 10.8 | 4,139                               | 4.0  | 29,446                               | 2.7  |
| Depression                         | 11,149                       | 5.2  | 5,033                           | 6.0  | 894                                      | 5.3  | 356                                    | 3.6  | 4,866                               | 4.7  | 29,911                               | 2.8  |
| Substance abuse-related diagnoses  | 11,565                       | 5.4  | 4,782                           | 5.7  | 1,353                                    | 8.1  | 520                                    | 5.3  | 4,910                               | 4.7  | 24,246                               | 2.3  |
| Alcohol abuse or Alcohol cirrhosis | 10,549                       | 4.9  | 4,393                           | 5.2  | 1,259                                    | 7.5  | 460                                    | 4.7  | 4,437                               | 4.3  | 21,197                               | 2.0  |
| Other substance abuse              | 2,102                        | 1.0  | 834                             | 1.0  | 223                                      | 1.3  | 131                                    | 1.3  | 914                                 | 0.9  | 5,334                                | 0.5  |
| Brain imaging <sup>‡</sup>         | 81,107                       | 76.9 | 44,672                          | 83.5 | 6,923                                    | 79.9 | 3,996                                  | 83.2 | 25,516                              | 66.2 | N/A                                  |      |

\*Myocardial infarction, heart failure, atrial fibrillation or flutter, diabetes, hypertension, hyperlipidemia (including hypercholesterolemia), and smoking.

<sup>†</sup>Smoking-related diagnoses, individual smoking cessation interventions, and administrative coding for smoking.

<sup>‡</sup>Computed tomography or magnetic resonance during first stroke admission, starting from the index year 2000.

N/A=non-applicable

**Supplemental Table III.** Hazard ratios (HRs) for dementia in patients with first-time stroke of any type or ischemic stroke, in the context of previous cohort studies not restricted to patients age 65 years or older.

| Study                     | Index Period | Stroke Type              | Age at Cohort Entry | Index Date               | Follow-up Period | Relative Risks For Dementia (95% Confidence Interval) |               |                                               |
|---------------------------|--------------|--------------------------|---------------------|--------------------------|------------------|-------------------------------------------------------|---------------|-----------------------------------------------|
|                           |              |                          |                     |                          |                  | Type of Measure                                       | Study Measure | Standardized Measure, Denmark (Present Study) |
| Ivan <i>et al.</i> 2004   | 1982-2001    | Any-type                 | < 95 years          | 6 months after stroke    | up to 10 years   | Age and sex adjusted HR                               | 2.2 (1.5-3.1) | 1.80 (1.76-1.83)                              |
| Reitz <i>et al.</i> 2008  | 1990-1993    | Ischemic ICH unspecified | ≥ 55 years          | Stroke date              | up to 10 years   | Age and sex adjusted HR                               | 2.1 (1.6-2.8) | 1.78 (1.74-1.82)                              |
| Kokmen <i>et al.</i> 1996 | 1960-1984    | Ischemic                 | ≥ 50 years          | year of onset + 3 months | up to 25 years   | Standardized incidence ratio*                         | 3.2 (2.8-3.7) | 1.58 (1.54-1.62)                              |

\*Excess risk in the stroke cohort compared with the risk in the population with the same age and sex distribution as in the stroke cohort. The index date of the present study was 3 months after stroke diagnosis when we compared our findings with the Reitz *et al.* 2008 study. ICH = intracerebral hemorrhage.

**Supplemental Table IV.** Hazard ratios for dementia by age at index date, according to type of incident stroke.

| Type of Incident Stroke                                 | Age at Index Date (Years) |                  |                  |                  |                  |
|---------------------------------------------------------|---------------------------|------------------|------------------|------------------|------------------|
|                                                         | 18-44                     | 45-64            | 65-74            | 75-84            | 85+              |
| <i>Dementia Hazard Ratios (95% Confidence Interval)</i> |                           |                  |                  |                  |                  |
| <i>Overall follow-up</i>                                |                           |                  |                  |                  |                  |
| All                                                     | 6.69 (5.36–8.35)          | 3.11 (2.95–3.27) | 2.12 (2.05–2.19) | 1.54 (1.50–1.59) | 1.19 (1.12–1.25) |
| Ischemic                                                | 6.92 (4.51–10.6)          | 3.06 (2.81–3.34) | 2.05 (1.93–2.17) | 1.45 (1.38–1.53) | 1.17 (1.07–1.28) |
| ICH                                                     | 7.01 (3.92–12.5)          | 4.58 (3.92–5.34) | 3.52 (3.11–3.98) | 2.02 (1.80–2.26) | 1.36 (1.11–1.67) |
| SAH                                                     | 7.39 (4.97–11.0)          | 3.00 (2.53–3.56) | 1.99 (1.60–2.47) | 2.30 (1.76–3.01) | 2.23 (1.21–4.09) |
| <i>3-12 months following stroke diagnosis</i>           |                           |                  |                  |                  |                  |
| All                                                     | 141 (19.2–1,036)          | 13.7 (10.8–17.4) | 4.86 (4.29–5.49) | 2.30 (2.14–2.48) | 1.53 (1.38–1.68) |
| Ischemic                                                | -*                        | 15.0 (10.1–22.2) | 3.86 (3.16–4.71) | 1.94 (1.72–2.20) | 1.56 (1.33–1.82) |
| ICH                                                     | -*                        | 27.9 (13.2–59.2) | 8.46 (5.41–13.3) | 3.44 (2.63–4.50) | 2.29 (1.62–3.24) |
| SAH                                                     | -*                        | 16.3 (7.72–34.3) | 4.87 (2.26–10.5) | 3.53 (1.80–6.91) | 3.04 (1.26–7.35) |
| <i>&gt; 1-10 years following stroke diagnosis</i>       |                           |                  |                  |                  |                  |
| All                                                     | 14.1 (9.21–21.5)          | 4.21 (3.91–4.54) | 2.24 (2.15–2.34) | 1.46 (1.42–1.51) | 1.07 (1.01–1.14) |
| Ischemic                                                | 14.9 (6.68–33.0)          | 4.12 (3.64–4.68) | 2.10 (1.96–2.25) | 1.39 (1.32–1.47) | 1.04 (0.94–1.16) |
| ICH                                                     | 42.0 (9.71–182)           | 6.42 (5.13–8.03) | 3.98 (3.43–4.62) | 1.80 (1.59–2.05) | 1.06 (0.82–1.38) |
| SAH                                                     | 12.0 (5.54–26.2)          | 3.40 (2.48–4.65) | 2.17 (1.62–2.91) | 2.16 (1.59–2.93) | 1.72 (0.74–3.97) |
| <i>&gt; 10-30 years following stroke diagnosis</i>      |                           |                  |                  |                  |                  |
| All                                                     | 3.43 (2.56–4.60)          | 1.97 (1.83–2.12) | 1.35 (1.25–1.46) | 1.14 (1.00–1.30) | 1.86 (0.63–5.48) |
| Ischemic                                                | 3.43 (1.95–6.06)          | 1.86 (1.64–2.12) | 1.43 (1.25–1.64) | 1.16 (0.89–1.50) | -†               |
| ICH                                                     | 2.53 (1.16–5.54)          | 2.40 (1.89–3.03) | 1.77 (1.36–2.30) | 2.30 (1.19–4.44) | -‡               |
| SAH                                                     | 4.36 (2.63–7.22)          | 2.36 (1.90–2.93) | 1.46 (1.01–2.09) | 1.76 (0.60–5.14) | -‡               |

\*No outcomes in the comparison cohort.

†Few outcomes, with imprecise estimates (0-∞).

‡No outcomes in the stroke cohort.

ICH = intracerebral hemorrhage, SAH = subarachnoid hemorrhage.

**Supplemental Table V.** Dementia rates and hazard ratios among stroke survivors, according to sex and type of incident stroke.

| Stroke Type     | Cohort     | Male         |          |                  |                        | Female       |          |                  |                        |
|-----------------|------------|--------------|----------|------------------|------------------------|--------------|----------|------------------|------------------------|
|                 |            | Person-years | N Events | Rate* (95% CI)   | Unadjusted HR (95% CI) | Person-years | N Events | Rate* (95% CI)   | Unadjusted HR (95% CI) |
| <i>All</i>      | Stroke     | 727,681      | 8,321    | 11.4 (11.2-11.7) | 2.06 (2.00–2.12)       | 647,527      | 8,823    | 13.6 (13.3-13.9) | 1.61 (1.57–1.66)       |
|                 | Comparison | 4,929,288    | 36,469   | 7.40 (7.32-7.47) | <i>reference</i>       | 4,449,352    | 48,757   | 11.0 (10.9-11.1) | <i>reference</i>       |
| <i>Ischemic</i> | Stroke     | 279,661      | 2,971    | 10.6 (10.2-11.0) | 1.91 (1.82–2.00)       | 220,893      | 2,981    | 13.5 (13.0-14.0) | 1.56 (1.50–1.63)       |
|                 | Comparison | 1,814,848    | 12,704   | 7.00 (6.88-7.12) | <i>reference</i>       | 1,457,314    | 15,594   | 10.7 (10.5-10.9) | <i>reference</i>       |
| <i>ICH</i>      | Stroke     | 62,732       | 820      | 13.1 (12.2-14.0) | 3.59 (3.26–3.96)       | 49,996       | 720      | 14.4 (13.4-15.5) | 2.10 (1.91–2.31)       |
|                 | Comparison | 431,721      | 2,448    | 5.67 (5.45-5.89) | <i>reference</i>       | 352,116      | 3,290    | 9.34 (9.02-9.66) | <i>reference</i>       |
| <i>SAH</i>      | Stroke     | 43,225       | 219      | 5.07 (4.40-5.74) | 3.28 (2.72–3.96)       | 64,928       | 346      | 5.33 (4.77-5.89) | 2.48 (2.16–2.85)       |
|                 | Comparison | 242,792      | 531      | 2.19 (2.00-2.37) | <i>reference</i>       | 370,075      | 1,074    | 2.90 (2.73-3.08) | <i>reference</i>       |

\*Per 1,000 person-years

HR = Hazard ratio



**Supplemental Table VI.** Rates of Alzheimer's disease, vascular dementia, and other dementia, and hazard ratios (HRs) for specific dementias, according to stroke type.

| Stroke Type     | Cohort                   | Person-years | Alzheimer's Disease |                  |                        | Vascular Dementia |                  |                        | Other Dementia |                  |                        |
|-----------------|--------------------------|--------------|---------------------|------------------|------------------------|-------------------|------------------|------------------------|----------------|------------------|------------------------|
|                 |                          |              | N Events            | Rate* (95% CI)   | Unadjusted HR (95% CI) | N Events          | Rate* (95% CI)   | Unadjusted HR (95% CI) | N Events       | Rate* (95% CI)   | Unadjusted HR (95% CI) |
| <i>All</i>      | Comparison (N=1,075,588) | 9,378,640    | 29,179              | 3.11 (3.08-3.15) | <i>reference</i>       | 10,464            | 1.12 (1.09-1.14) | <i>reference</i>       | 45,583         | 4.86 (4.82-4.90) | <i>reference</i>       |
|                 | Stroke (N=215,118)       | 1,375,208    | 3,303               | 2.40 (2.32-2.48) | 0.94 (0.91-0.98)       | 5,830             | 4.24 (4.13-4.35) | 5.24 (5.03-5.46)       | 8,011          | 5.83 (5.70-5.95) | 1.61 (1.57-1.66)       |
| <i>Ischemic</i> | Comparison (N=421,098)   | 3,272,150    | 10,075              | 3.08 (3.02-3.14) | <i>reference</i>       | 3,499             | 1.07 (1.03-1.10) | <i>reference</i>       | 14,724         | 4.50 (4.43-4.57) | <i>reference</i>       |
|                 | Stroke (N=84,220)        | 500,554      | 1,126               | 2.25 (2.12-2.38) | 0.85 (0.79-0.90)       | 2,146             | 4.29 (4.11-4.47) | 5.38 (5.03-5.75)       | 2,680          | 5.35 (5.15-5.56) | 1.52 (1.45-1.59)       |
| <i>ICH</i>      | Comparison (N=83,615)    | 783,850      | 1,995               | 2.55 (2.43-2.66) | <i>reference</i>       | 704               | 0.90 (0.83-0.96) | <i>reference</i>       | 3,039          | 3.88 (3.74-4.01) | <i>reference</i>       |
|                 | Stroke (N=16,723)        | 112,740      | 245                 | 2.17 (1.90-2.45) | 1.12 (0.97-1.29)       | 561               | 4.98 (4.56-5.39) | 8.60 (7.42-9.96)       | 734            | 6.51 (6.04-6.98) | 2.50 (2.27-2.76)       |
| <i>SAH</i>      | Comparison (N=49,360)    | 612,867      | 578                 | 0.94 (0.87-1.02) | <i>reference</i>       | 202               | 0.33 (0.28-0.38) | <i>reference</i>       | 825            | 1.35 (1.25-1.44) | <i>reference</i>       |
|                 | Stroke (N=9,872)         | 108,153      | 88                  | 0.81 (0.64-0.98) | 1.12 (0.87-1.43)       | 210               | 1.94 (1.68-2.20) | 8.61 (6.76-11.0)       | 267            | 2.47 (2.17-2.76) | 2.49 (2.12-2.92)       |

\*Per 1,000 person years.

ICH = intracerebral hemorrhage, SAH = subarachnoid hemorrhage.

**Supplemental Table VII.** Hazard ratios for dementia according to type of stroke, restricting the study population to stroke patients who underwent MRI or CT during hospitalization for stroke, as from the year 2000.

| Stroke Type     | Cohort                            | Person-Years | Dementia |                  | Hazard Ratios (95% Confidence Interval) |                      |                      |                      |
|-----------------|-----------------------------------|--------------|----------|------------------|-----------------------------------------|----------------------|----------------------|----------------------|
|                 |                                   |              | N Events | Rate* (95% CI)   | Unadjusted                              | Model 1 <sup>†</sup> | Model 2 <sup>‡</sup> | Model 3 <sup>§</sup> |
| <i>All</i>      | Comparison (N=405,533)            | 2,109,917    | 19,362   | 9.18 (9.05-9.31) | <i>reference</i>                        | <i>reference</i>     | <i>reference</i>     | <i>reference</i>     |
|                 | + <i>CT/MRI</i> Stroke (N=81,107) | 367,427      | 5,123    | 13.9 (13.6-14.3) | 1.75 (1.69–1.81)                        | 1.71 (1.65–1.78)     | 1.72 (1.66–1.79)     | 1.67 (1.61-1.73)     |
| <i>Ischemic</i> | Comparison (N=223,358)            | 1,045,894    | 9,760    | 9.33 (9.15-9.52) | <i>reference</i>                        | <i>reference</i>     | <i>reference</i>     | <i>reference</i>     |
|                 | + <i>CT/MRI</i> Stroke (N=44,672) | 185,245      | 2,471    | 13.3 (12.8-13.9) | 1.62 (1.54–1.70)                        | 1.57 (1.50–1.65)     | 1.57 (1.49–1.66)     | 1.53 (1.45-1.61)     |
| <i>ICH</i>      | Comparison (N=34,615)             | 182,317      | 1,418    | 7.78 (7.37-8.18) | <i>reference</i>                        | <i>reference</i>     | <i>reference</i>     | <i>reference</i>     |
|                 | + <i>CT/MRI</i> Stroke (N=6,923)  | 30,073       | 525      | 17.5 (16.0-19.0) | 2.84 (2.54–3.18)                        | 2.88 (2.55–3.25)     | 2.92 (2.59–3.30)     | 2.71 (2.40-3.07)     |
| <i>SAH</i>      | Comparison (N=19,980)             | 116,608      | 285      | 2.44 (2.16-2.73) | <i>reference</i>                        | <i>reference</i>     | <i>reference</i>     | <i>reference</i>     |
|                 | + <i>CT/MRI</i> Stroke (N=3,996)  | 21,936       | 146      | 6.65 (5.58-7.73) | 3.48 (2.79–4.35)                        | 3.36 (2.68–4.22)     | 3.36 (2.68–4.22)     | 3.05 (2.40-3.88)     |

\*Per 1,000 person-years

<sup>†</sup>Adjusted for diabetes, atrial fibrillation, hypertension, and smoking.<sup>‡</sup>Adjusted for Model 1 covariates + hyperlipidemia/hypercholesterolemia, myocardial infarction/or heart failure/or peripheral vascular disease.<sup>§</sup>Adjusted for Model 1 and 2 covariates + traumatic brain injury, depression and substance abuse.

ICH = Intracerebral hemorrhage, SAH = subarachnoid hemorrhage, CT = computed tomography, MRI = magnetic resonance imaging.

**Supplemental Table VIII.** Hazard ratios for dementia within the first year after stroke among ischemic stroke, intracerebral hemorrhage, and subarachnoid hemorrhage patients, with the index date set as 6 months post-stroke.

| Stroke Type     | Cohort                     | Person-Years | Dementia |                  | Hazard ratios (95% Confidence Interval) |                      |                      |                      |
|-----------------|----------------------------|--------------|----------|------------------|-----------------------------------------|----------------------|----------------------|----------------------|
|                 |                            |              | N Events | Rate* (95% CI)   | Unadjusted                              | Model 1 <sup>†</sup> | Model 2 <sup>‡</sup> | Model 3 <sup>§</sup> |
| <i>All</i>      | Comparison (N = 1,009,606) | 501,810      | 3,087    | 6.15 (5.93-6.37) | <i>reference</i>                        | <i>reference</i>     | <i>reference</i>     | <i>reference</i>     |
|                 | Stroke (N = 204,252)       | 99,552       | 1,439    | 14.5 (13.7-15.2) | 2.37 (2.22-2.52)                        | 2.32 (2.17-2.48)     | 2.32 (2.17-2.48)     | 2.24 (2.09-2.40)     |
| <i>Ischemic</i> | Comparison (N = 396,232)   | 195,749      | 1,218    | 6.22 (5.87-6.57) | <i>reference</i>                        | <i>reference</i>     | <i>reference</i>     | <i>reference</i>     |
|                 | Stroke (N = 80,073)        | 38,955       | 513      | 13.2 (12.0-14.3) | 2.12 (1.91-2.35)                        | 2.04 (1.83-2.28)     | 2.03 (1.81-2.27)     | 1.97 (1.76-2.20)     |
| <i>ICH</i>      | Comparison (N = 78,299)    | 38,906       | 196      | 5.04 (4.33-5.74) | <i>reference</i>                        | <i>reference</i>     | <i>reference</i>     | <i>reference</i>     |
|                 | Stroke (N = 15,790)        | 7,674        | 148      | 19.3 (16.2-22.4) | 3.85 (3.11-4.78)                        | 4.06 (3.21-5.13)     | 4.08 (3.22-5.17)     | 3.74 (2.92-4.78)     |
| <i>SAH</i>      | Comparison (N = 47,776)    | 23,936       | 38       | 1.59 (1.08-2.09) | <i>reference</i>                        | <i>reference</i>     | <i>reference</i>     | <i>reference</i>     |
|                 | Stroke (N = 9,588)         | 4,770        | 47       | 9.85 (7.03-12.7) | 6.09 (3.97-9.34)                        | 6.18 (3.94-9.69)     | 6.22 (3.96-9.78)     | 7.25 (4.32-12.2)     |

\*Per 1,000 person-years.

<sup>†</sup>Adjusted for diabetes, atrial fibrillation, hypertension, and smoking.

<sup>‡</sup>Adjusted for Model 1 covariates + hyperlipidemia/hypercholesterolemia, myocardial infarction/or heart failure/or peripheral vascular disease.

<sup>§</sup>Adjusted for Model 1 and 2 covariates + traumatic brain injury, depression, and substance abuse.

ICH = intracerebral hemorrhage, SAH = subarachnoid hemorrhage.

**Supplemental Table IX.** Dementia incidence rates and unadjusted hazard ratios (HRs), according to stroke type in the index periods of 1982-1994, 1995-2003 and 2004-2013.

| Stroke Type                                   | Cohort     | Index Period 1982-1994 |          |                     |                     | Index Period 1995-2003 |          |                     |                     | Index Period 2004-2013 |          |                     |                     |
|-----------------------------------------------|------------|------------------------|----------|---------------------|---------------------|------------------------|----------|---------------------|---------------------|------------------------|----------|---------------------|---------------------|
|                                               |            | Person-Years           | N Events | Rate* (95% CI)      | HR (95% CI)         | Person-Years           | N Events | Rate* (95% CI)      | HR (95% CI)         | Person-Years           | N Events | Rate* (95% CI)      | HR (95% CI)         |
| <i>3-12 months after stroke diagnosis</i>     |            |                        |          |                     |                     |                        |          |                     |                     |                        |          |                     |                     |
| <i>All</i>                                    | Comparison | 265,326                | 1,037    | 3.91<br>(3.67-4.15) | <i>reference</i>    | 269,205                | 1,946    | 7.23<br>(6.91-7.55) | <i>reference</i>    | 252,235                | 2,013    | 7.98<br>(7.63-8.33) | <i>reference</i>    |
|                                               | Stroke     | 50,349                 | 570      | 11.3<br>(10.4-12.3) | 3.06<br>(2.75-3.40) | 51,826                 | 906      | 17.5<br>(16.3-18.6) | 2.47<br>(2.28-2.68) | 48,922                 | 915      | 18.7<br>(17.5-19.9) | 2.42<br>(2.23-2.62) |
| <i>Ischemic</i>                               | Comparison | 73,920                 | 244      | 3.30<br>(2.89-3.72) | <i>reference</i>    | 87,608                 | 617      | 7.04<br>(6.49-7.60) | <i>reference</i>    | 144,033                | 1,112    | 7.72<br>(7.27-8.17) | <i>reference</i>    |
|                                               | Stroke     | 14,140                 | 134      | 9.48<br>(7.87-11.1) | 3.07<br>(2.47-3.81) | 16,958                 | 265      | 15.6<br>(13.8-17.5) | 2.23<br>(1.93-2.58) | 28,060                 | 455      | 16.2<br>(14.7-17.7) | 2.16<br>(1.93-2.41) |
| <i>ICH</i>                                    | Comparison | 19,422                 | 42       | 2.16<br>(1.51-2.82) | <i>reference</i>    | 20,484                 | 106      | 5.18<br>(4.19-6.16) | <i>reference</i>    | 21,362                 | 152      | 7.12<br>(5.98-8.25) | <i>reference</i>    |
|                                               | Stroke     | 3,672                  | 43       | 11.7<br>(8.21-15.2) | 5.67<br>(3.65-8.80) | 3,904                  | 85       | 21.8<br>(17.2-26.4) | 4.11<br>(3.08-5.49) | 4,087                  | 113      | 27.6<br>(22.5-32.7) | 4.13<br>(3.22-5.31) |
| <i>SAH</i>                                    | Comparison | 12,664                 | 10       | 0.79<br>(0.30-1.28) | <i>reference</i>    | 11,456                 | 18       | 1.57<br>(0.84-2.30) | <i>reference</i>    | 12,346                 | 34       | 2.75<br>(1.83-3.68) | <i>reference</i>    |
|                                               | Stroke     | 2,489                  | 12       | 4.82<br>(2.09-7.55) | 6.67<br>(2.81-15.8) | 2,245                  | 31       | 13.8<br>(8.93-18.6) | 9.55<br>(5.23-17.5) | 2,428                  | 35       | 14.4<br>(9.65-19.2) | 5.41<br>(3.35-8.75) |
| <i>&gt; 1-10 years after stroke diagnosis</i> |            |                        |          |                     |                     |                        |          |                     |                     |                        |          |                     |                     |
| <i>All</i>                                    | Comparison | 2,146,444              | 12,355   | 5.76<br>(5.65-5.86) | <i>reference</i>    | 2,255,353              | 21,709   | 9.63<br>(9.50-9.75) | <i>reference</i>    | 1,214,595              | 10,258   | 8.45<br>(8.28-8.61) | <i>reference</i>    |
|                                               | Stroke     | 345,321                | 3,063    | 8.87<br>(8.56-9.18) | 1.84<br>(1.76-1.93) | 392,254                | 5,758    | 14.7<br>(14.3-15.1) | 1.73<br>(1.67-1.78) | 227,823                | 2,976    | 13.1<br>(12.6-13.5) | 1.65<br>(1.58-1.72) |
| <i>Ischemic</i>                               | Comparison | 631,655                | 3,007    | 4.76<br>(4.59-4.93) | <i>reference</i>    | 751,618                | 6,934    | 9.23<br>(9.01-9.44) | <i>reference</i>    | 636,230                | 5,499    | 8.64<br>(8.41-8.87) | <i>reference</i>    |
|                                               | Stroke     | 103,895                | 759      | 7.31<br>(6.79-7.82) | 1.81<br>(1.65-1.97) | 131,955                | 1,886    | 14.3<br>(13.7-14.9) | 1.69<br>(1.60-1.79) | 120,926                | 1,506    | 12.5<br>(11.8-13.1) | 1.53<br>(1.44-1.62) |
| <i>ICH</i>                                    | Comparison | 169,617                | 709      | 4.18<br>(3.87-4.49) | <i>reference</i>    | 178,779                | 1,332    | 7.45<br>(7.05-7.85) | <i>reference</i>    | 100,491                | 761      | 7.57<br>(7.03-8.11) | <i>reference</i>    |
|                                               | Stroke     | 28,011                 | 247      | 8.82<br>(7.72-9.92) | 2.49<br>(2.12-2.94) | 29,951                 | 501      | 16.7<br>(15.3-18.2) | 2.78<br>(2.47-3.13) | 18,166                 | 284      | 15.6<br>(13.8-17.5) | 2.44<br>(2.10-2.82) |
| <i>SAH</i>                                    | Comparison | 136,518                | 175      | 1.28<br>(1.09-1.47) | <i>reference</i>    | 122,976                | 254      | 2.07<br>(1.81-2.32) | <i>reference</i>    | 68,149                 | 136      | 2.00<br>(1.66-2.33) | <i>reference</i>    |
|                                               | Stroke     | 25,742                 | 67       | 2.60<br>(1.98-3.23) | 2.41<br>(1.78-3.26) | 23,692                 | 97       | 4.09<br>(3.28-4.91) | 2.35<br>(1.82-3.03) | 13,249                 | 77       | 5.81<br>(4.51-7.11) | 3.40<br>(2.52-4.60) |

\*Per 1,000 person-years;

ICH = intracerebral hemorrhage, SAH = subarachnoid hemorrhage.
